# Supplementary material
Source: publisher figshare collection journal article supplement (https://acs.figshare.com/ndownloader/files/5170966)
Supplement: Supplementary file 1 [file 5170966]

# Assembly of an Antiparallel Homo-Adenine DNA Duplex by Small Molecule Binding

Özgül Persil, Catherine T. Santai, Swapan S. Jain and Nicholas V. Hud

*School of Chemistry and Biochemistry, Parker H. Petit Institute of Bioengineering and Biosciences, Georgia Institute of Technology, Atlanta, GA 30332-0400, USA*

E-mail: [hud@chemistry.gatech.edu](mailto:hud@chemistry.gatech.edu)

## Supporting Information

### Materials and Methods:

**Sample Preparation.** (dA)<sub>4</sub> and 3'-d(A)<sub>8</sub>-5'-5'-d(A)<sub>8</sub>-3' oligodeoxynucleotides were synthesized in house on an automated synthesizer using standard phosphoramidite chemistry. (dA)<sub>8</sub>, (dA)<sub>16</sub>, (dA)<sub>32</sub>, d(GACCCGCA<sub>8</sub>CCTCGCC) and d(GGCGAGGA<sub>8</sub>GCGGGTC) oligonucleotides were purchased from IDT (Coralville, IA). Full-length oligonucleotides were separated from failure sequences by denaturing polyacrylamide gel electrophoresis. Full-length products were extracted from the gel matrix using the crush-and-soak method followed by ethanol precipitation and desalting by passage over a 1 m G-25 sephadex column. Column fractions containing purified oligonucleotides were pooled, lyophilized and resuspended in dH<sub>2</sub>O. Coralyne chloride and proflavine hemisulfate were purchased from Sigma and used without further purification.

Oligonucleotide and small molecule concentrations were determined by UV-Vis spectroscopy using the following extinction coefficients: (dA)<sub>4</sub>,  $\epsilon_{260} = 51\,400\text{ M}^{-1}\text{ cm}^{-1}$ ; (dA)<sub>8</sub>,  $\epsilon_{260} = 99\,400\text{ M}^{-1}\text{ cm}^{-1}$ ; (dA)<sub>16</sub>,  $\epsilon_{260} = 195\,400\text{ M}^{-1}\text{ cm}^{-1}$ ; (dA)<sub>32</sub>,  $\epsilon_{260} = 387\,400\text{ M}^{-1}\text{ cm}^{-1}$ ; GACCCGCA<sub>8</sub>CCTCGCC,  $\epsilon_{260} = 212\,100\text{ M}^{-1}\text{ cm}^{-1}$ ; and GGCGAGGA<sub>8</sub>GCGGGTC,  $\epsilon_{260} = 231\,900\text{ M}^{-1}\text{ cm}^{-1}$ ; 3'-d(A)<sub>8</sub>-5'-5'-d(A)<sub>8</sub>-3',  $\epsilon_{260} = 195\,400\text{ M}^{-1}\text{ cm}^{-1}$ ; coralyne chloride,  $\epsilon_{420} = 14\,500\text{ M}^{-1}\text{ cm}^{-1}$ ; proflavine hemisulfate,  $\epsilon_{444} = 38\,900\text{ M}^{-1}\text{ cm}^{-1}$ .

**Polyacrylamide gel electrophoresis (PAGE).** Oligonucleotides were 5'-end labeled using  $\gamma$ -<sup>32</sup>P-ATP (ICN) and T4 polynucleotide kinase (New England Biolabs). Non-denaturing PAGE experiments were run in a standard 1× TBE buffer (Tris-Borate-EDTA), at a constant power of 7 W and an ambient temperature of 4°C. Gels were imaged using a Fuji Phosphor Imager (FLA-3000).

**Circular dichroism (CD) and UV-Vis spectrophotometry.** CD spectra were acquired on a JASCO J-810 CD spectropolarimeter equipped with Peltier temperature control unit. Spectra were acquired using a 1 cm path length cell. UV-Vis absorbance measurements were performed using a HP 8453 UV-Vis diode array spectrophotometer equipped with an Agilent 89090A Peltier temperature control unit. UV melting profiles were acquired by increasing the sample temperature at a rate of 1°C min<sup>-1</sup> from 5 to 80°C.

**Atomic Force Microscopy (AFM).** Scanning force images were acquired using a Nanoscope IIIa AFM (Digital Instruments) equipped with a J scanner operating in tapping mode. AFM tips were NSC12 non-contact silicon rectangular cantilevers (Mikromasch USA, Portland), which were cleaned with ozone prior to use. Samples (20  $\mu$ l) were deposited onto freshly cleaved mica, incubated for 30 min at 4°C, rinsed once with dH<sub>2</sub>O (4°C), wicked dry by touching an edge of the mica to filter paper, blown dry with nitrogen gas and stored overnight in a vacuum desiccator at room temperature. Samples were imaged under ambient conditions. Images were flattened to remove background slope in the horizontal dimensions.

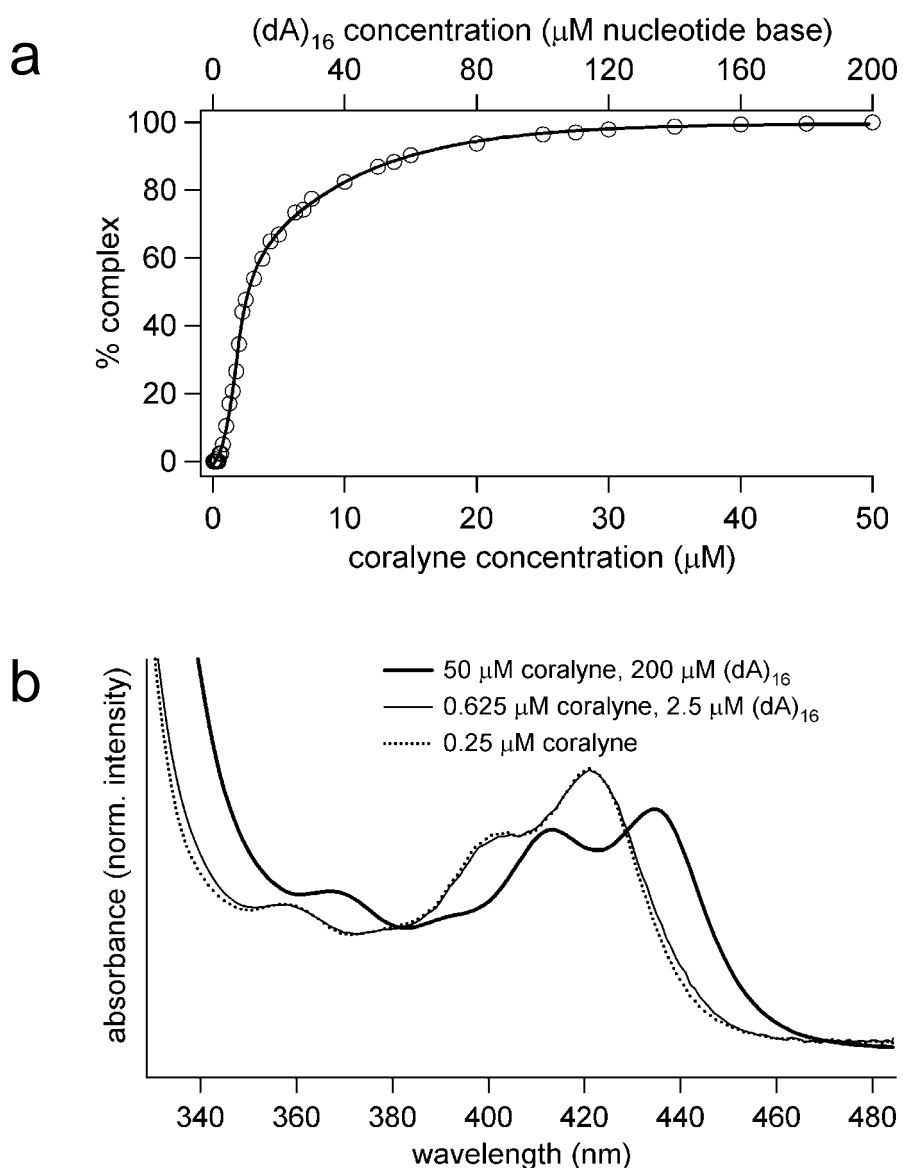

**Figure S1. (a)** Plot of percent (dA)<sub>16</sub>-coralyn complex formed as a function of DNA and coralyn concentration. The relative concentration of coralyn to (dA)<sub>16</sub> was one coralyn molecule per four nucleotide base for all data points, the stoichiometry previously determined for the poly(dA)-coralyn complex (Polak and Hud, *Nucleic Acids Res.* **2002**, 30, 983-992). Percent of (dA)<sub>16</sub>-coralyn complex formed at each concentration was determined by performing a least-squares fit of the corresponding UV absorption spectrum as a weighted sum of two absorption spectra, which were the spectrum of 200 μM (dA)<sub>16</sub> (in nucleotide base), 50 μM coralyn and a spectrum of 0.025 μM coralyn (i.e. free coralyn with no DNA). All samples contained 115 mM NaCl and 13 mM NaCacodylic, pH 6.8. Spectra were acquired at 22°C. **(b)** UV absorbance spectra representative of those used to generate the plot in **a**. The spectral region from 340 to 375 nm was that used to determine the fraction of (dA)<sub>16</sub>-coralyn complex formed.

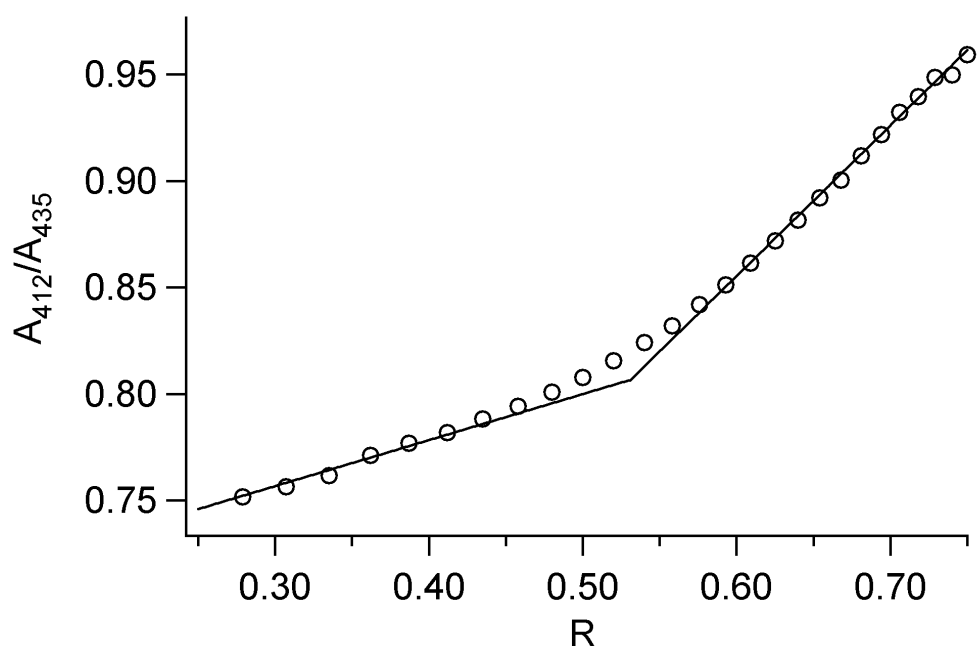

**Figure S2.** Job Plot analysis of **plusA8-minusA8** with coralyne.  $A_{412}/A_{435}$  is the ratio of coralyne absorbance at 412 nm versus 435 nm.  $R = [\text{coralyne}]/([\text{coralyne}] + [(dA)/4])$ . The combined concentration of coralyne and  $(dA)/4$  was 15  $\mu\text{M}$  for each data point in the Job plot.

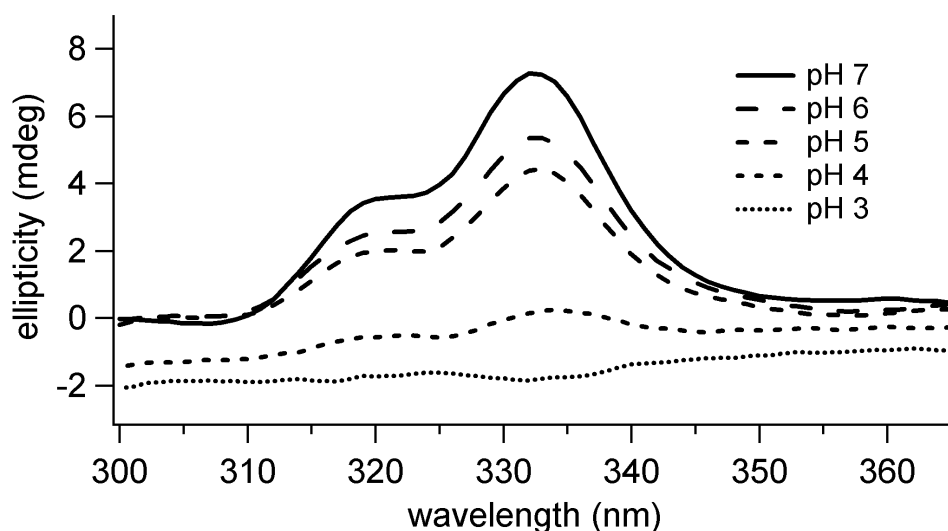

**Figure S3.** The 300 to 365 nm region of CD spectra of  $(dA)_{32}$  with coralyne at various pH values. The reduction of the positive CD bands in this region at lower pH indicates the reduced stability of the  $(dA)_{32}$ –coralyne complex with decreasing pH. Samples were 55  $\mu\text{M}$  nucleotide base, 14  $\mu\text{M}$  coralyne, 115 mM NaCl and 13 mM NaCacodylic. Samples with pH lower than 7 were prepared by the titration of a pH 7 sample with 1M HCl.
